# Supplementary material
Source: Springer Nature journal article supplement (http://www.springermedizin.de/resource/supplementary/13054_2009_8437_MOESM1_ESM.pdf/9731962)

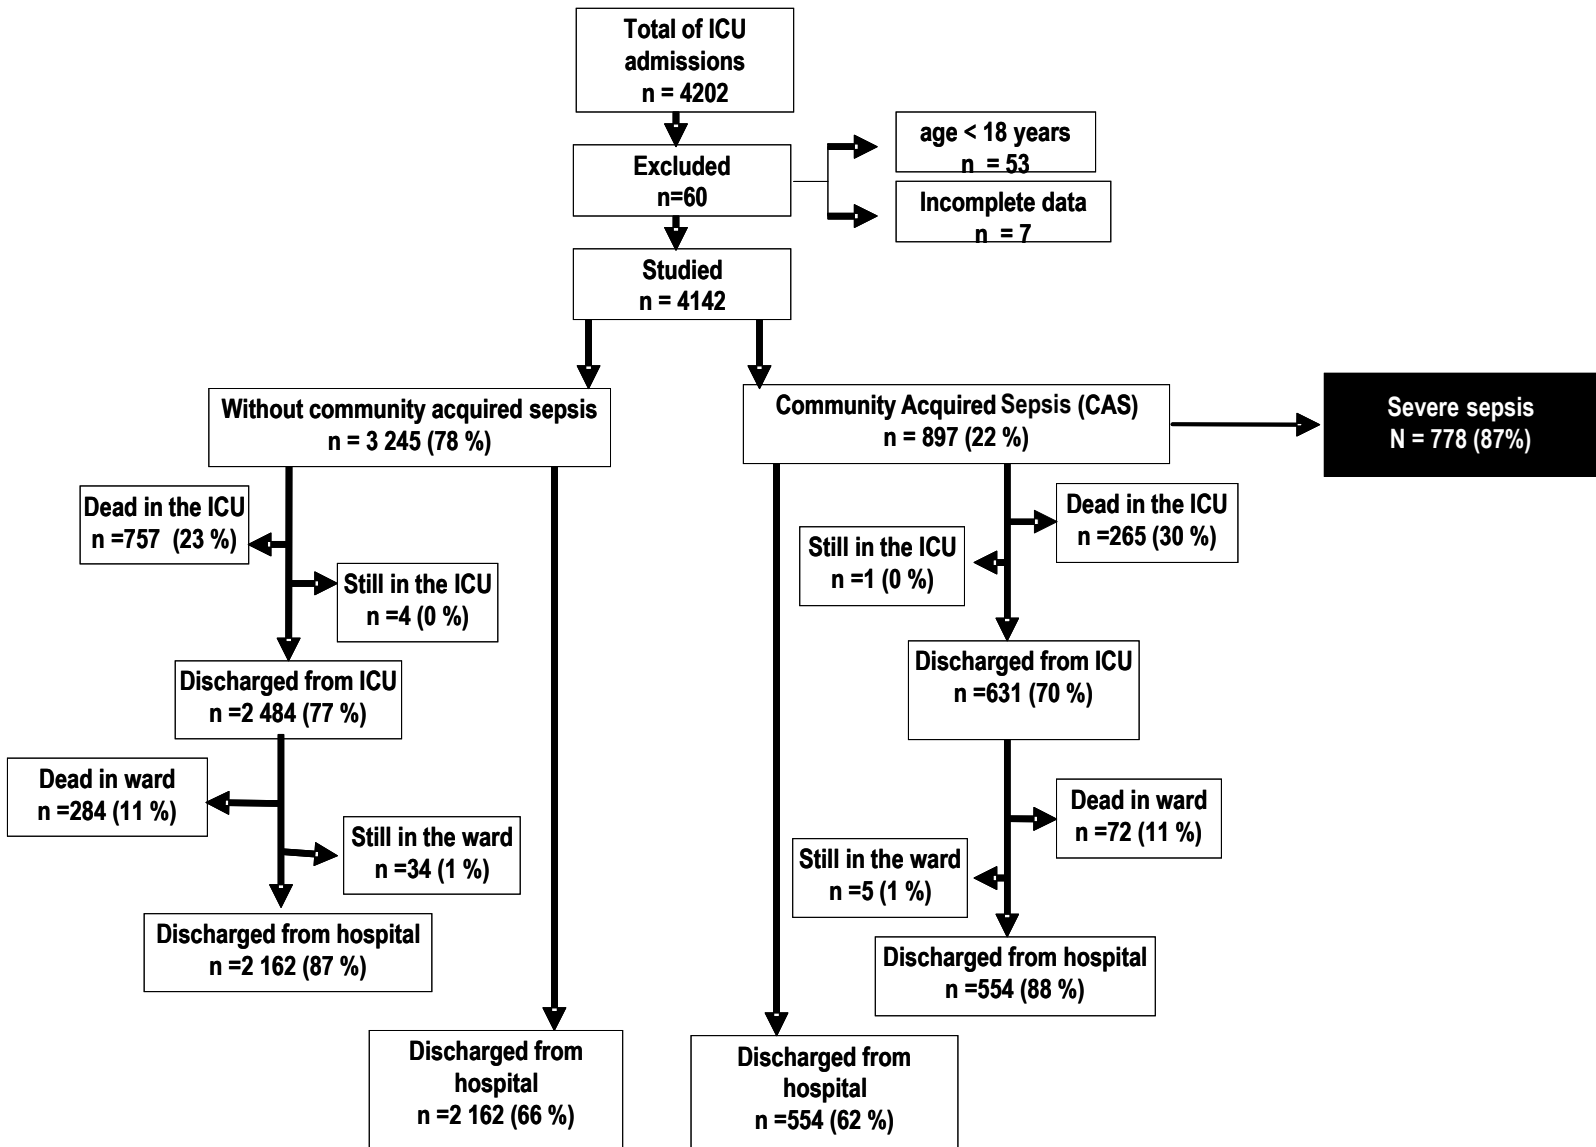

Supplement: MOESM1 [file 9731962]
